# Supplementary material for: Variations in the quality of tuberculosis care in urban India: A cross-sectional, standardized patient study in two cities
Source: PLOS journal article supplement (doi:10.1371/journal.pmed.1002653), 2018-09-25

S3 Fig: ANOVA decomposition of quality correlates

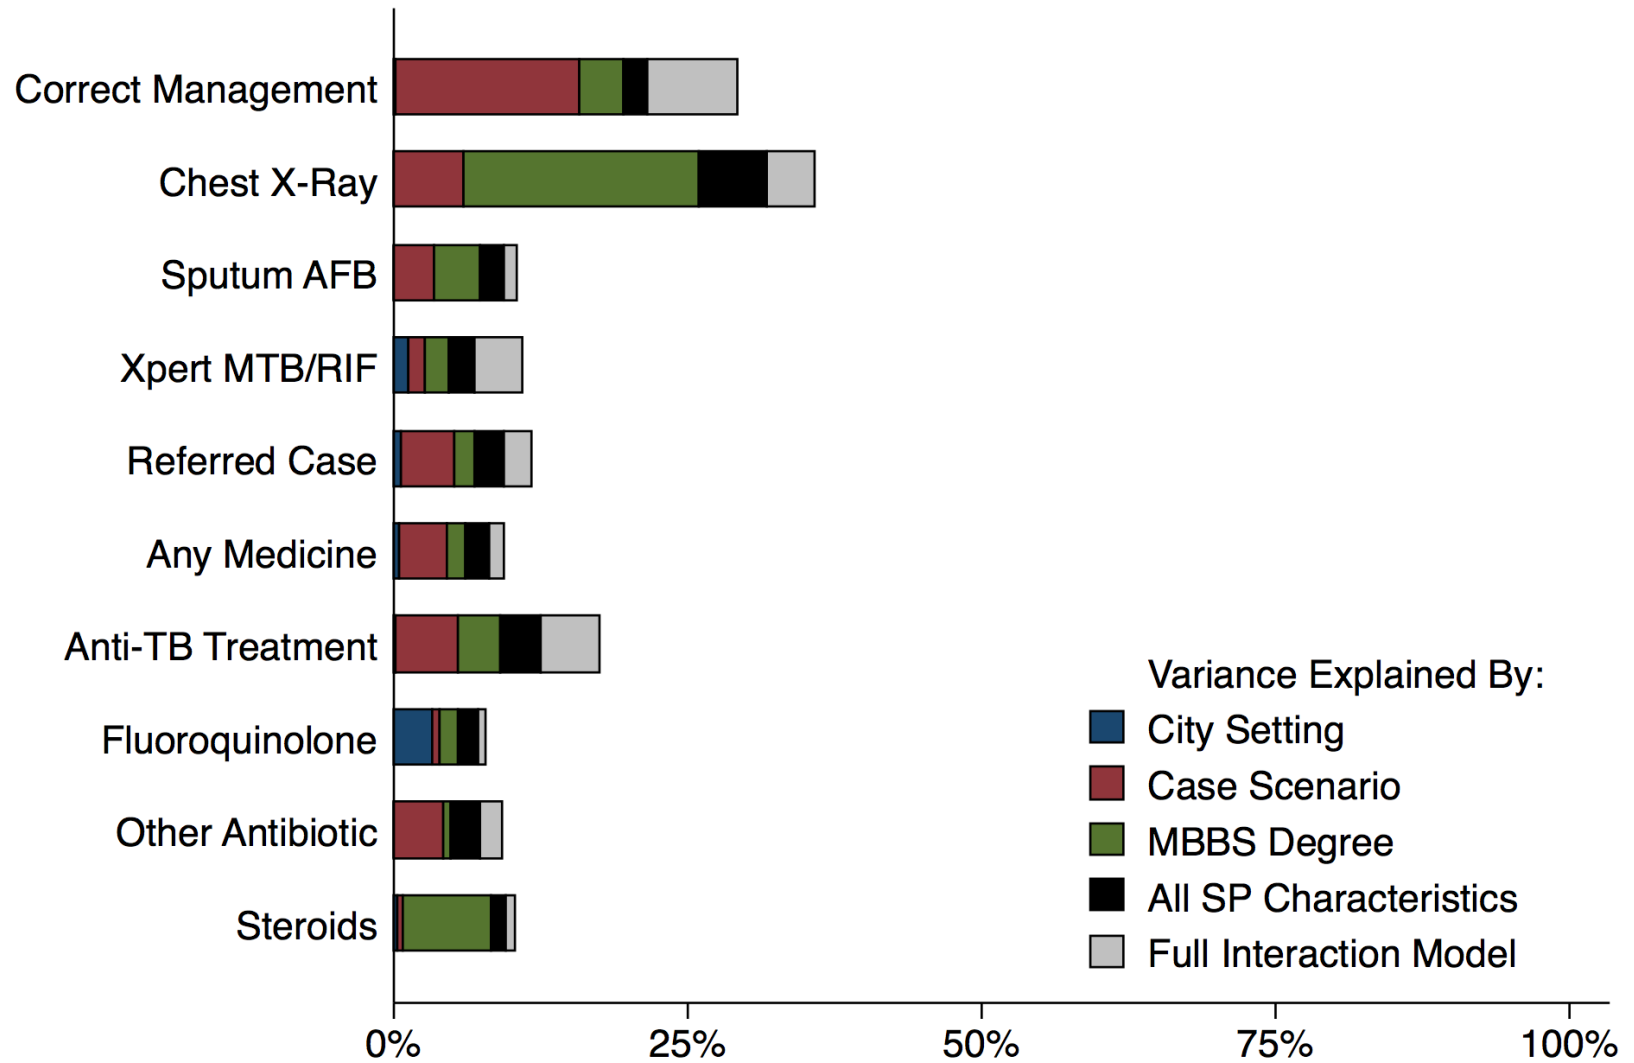

Supplement: S7 (10.1371/journal.pmed.1002653.s007) [file journal.pmed.1002653.s007]
