# Supplementary material for: Variations in the quality of tuberculosis care in urban India: A cross-sectional, standardized patient study in two cities
Source: PLOS journal article supplement (doi:10.1371/journal.pmed.1002653), 2018-09-25

S5 Fig: Distributions of checklist completion in Case 1 visits

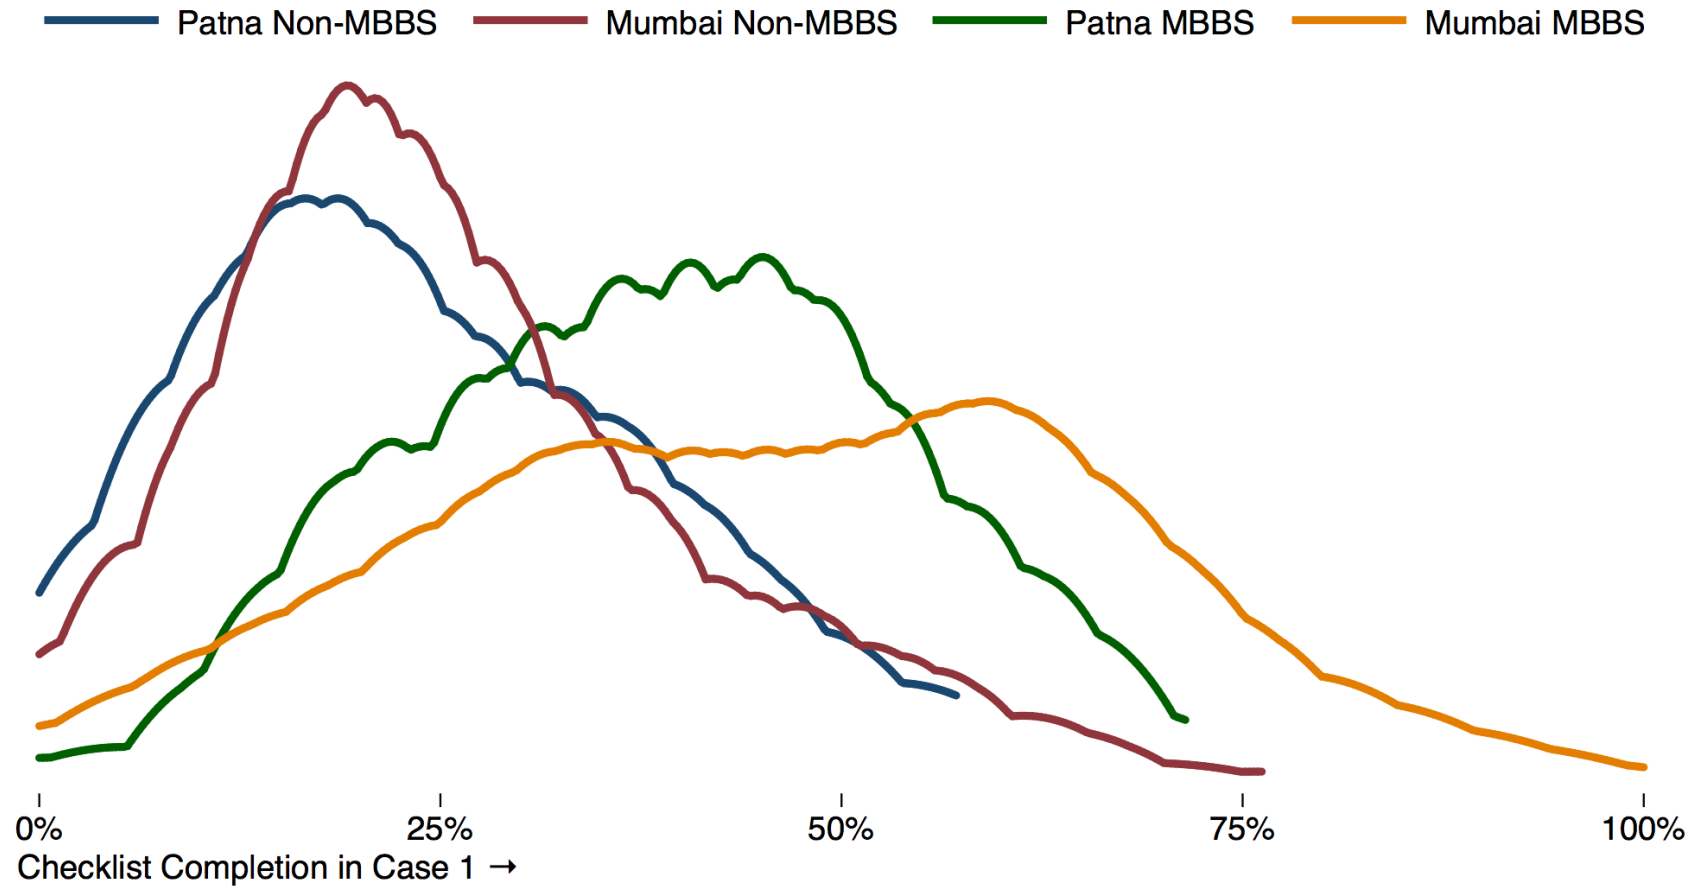

Supplement: S9 (10.1371/journal.pmed.1002653.s009) [file journal.pmed.1002653.s009]
