# Supplementary material for: Variations in the quality of tuberculosis care in urban India: A cross-sectional, standardized patient study in two cities
Source: PLOS journal article supplement (doi:10.1371/journal.pmed.1002653), 2018-09-25

**S6 Fig: Comparison between AYUSH and non-AYUSH treatment outcomes**

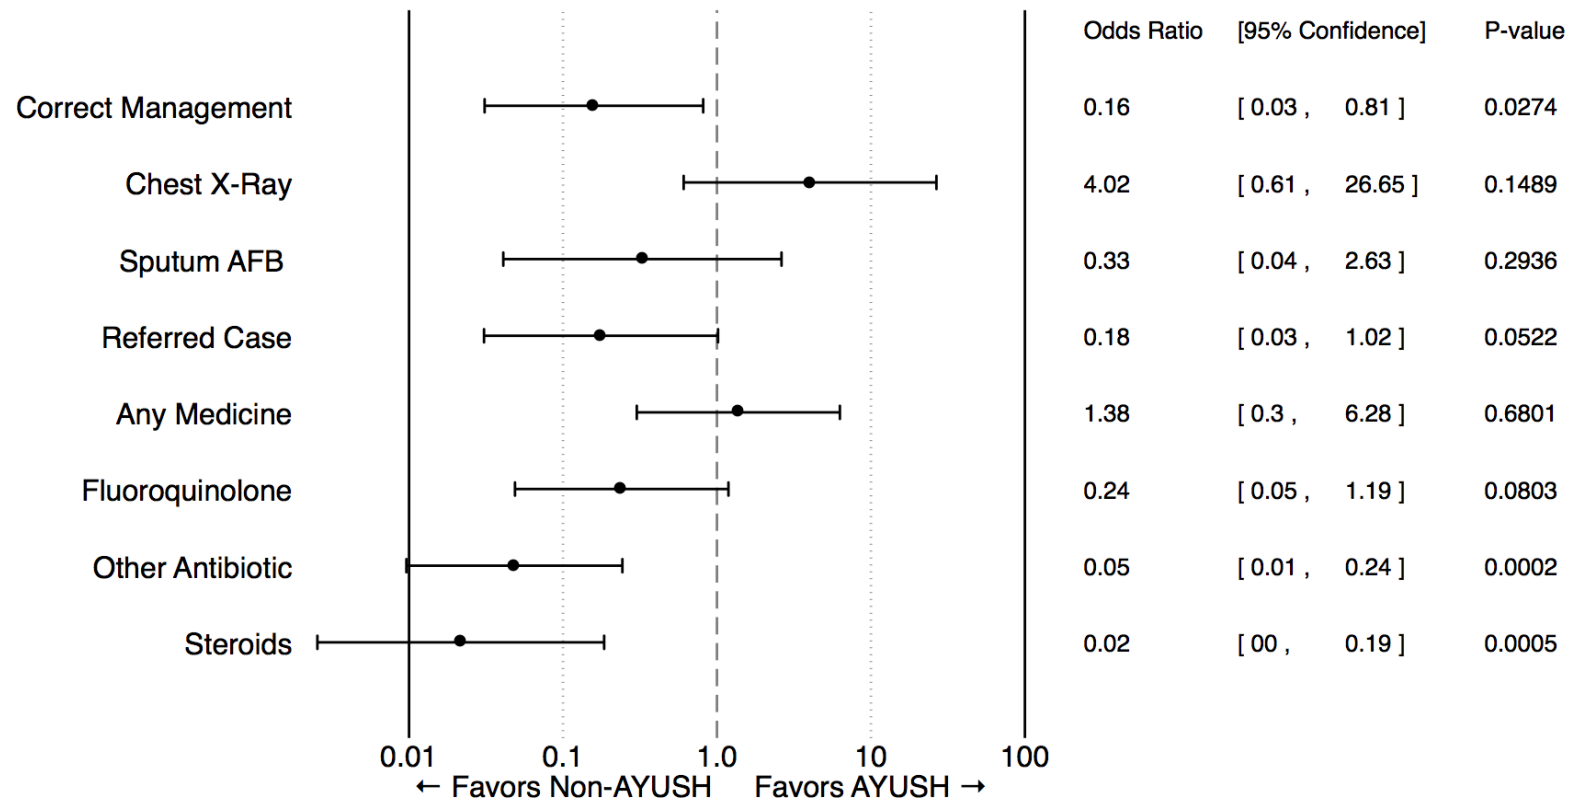

Supplement: S10 (10.1371/journal.pmed.1002653.s010) [file journal.pmed.1002653.s010]
